# Supplementary material
Source: publisher figshare collection journal article supplement (https://springernature.figshare.com/ndownloader/files/14548388)

Additional file 2: **Figure S2** Transgenic detection using PCR and qRT-PCR methods

A：Transgenic detection using PCR methods. Lane 1：Marker; Lane 2: H2O; Lane 3: Positive control; Lane 4: Negative control; Lane5-11: transgenic tobacco plants. B: Transgenic detection using qRT-PCR methods.


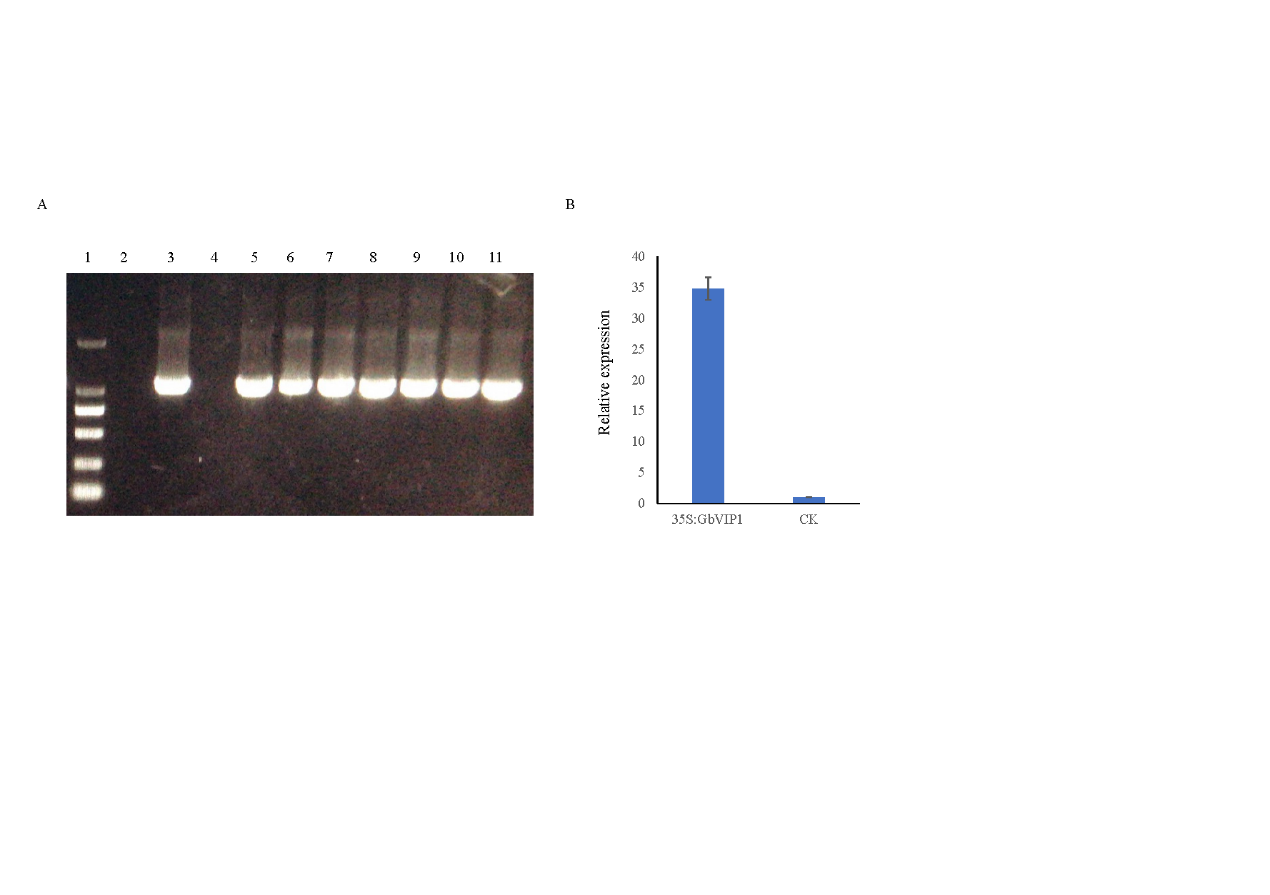

Supplement: Supplementary file 1 [file 14548388]
